# Supplementary material for: Anisotropic thermoelectric properties of layered compounds in SnX2 (X = S, Se): a promising thermoelectric material
Source: Royal Society of Chemistry journal article supplement (doi:10.1039/c5cp03700j), 2015-01-01
Supplement: c5cp03700j1.pdf [file c5cp03700j1.pdf]

**Supplementary Information for**  
**Anisotropic thermoelectric properties of layered compounds**  
**in SnX<sub>2</sub> (X = S, Se): A promising thermoelectric**

Bao-Zhen Sun,<sup>1,2</sup> Zuju Ma,<sup>1</sup> Chao He<sup>1</sup> and Kechen Wu<sup>1,a)</sup>

<sup>1</sup> *State Key Laboratory of Structural Chemistry, Fujian Institute of Research on the  
Structure of Matter, Chinese Academy of Sciences, Fuzhou 350002, China*

<sup>2</sup> *School Chemistry and Chemical Engineering, Guangxi University, Nanning 530004,  
China*

---

<sup>a)</sup> Author to whom correspondence should be addressed. Electronic mail: [wkc@fjirsm.ac.cn](mailto:wkc@fjirsm.ac.cn).

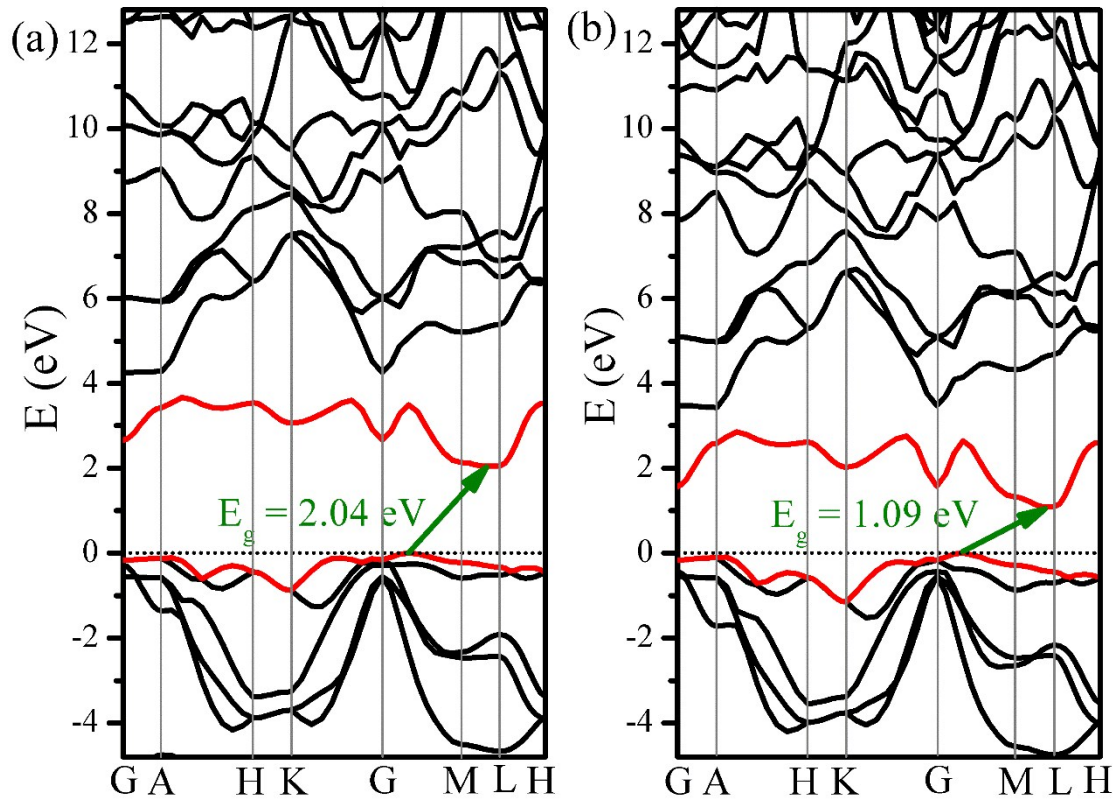

**Fig. S1.** Band structures of SnS<sub>2</sub> (a) and SnSe<sub>2</sub> (b). Top of the valence band is set to zero. The highest valence band and lowest conduction band are highlighted in red.  $G$ ,  $A$ ,  $H$ ,  $K$ ,  $M$ ,  $L$  are  $(0\ 0\ 0)$ ,  $(0\ 0\ 0.5)$ ,  $(-0.333\ 0.667\ 0.5)$ ,  $(-0.333\ 0.667\ 0)$ ,  $(0\ 0.5\ 0)$ ,  $(0\ 0.5\ 0.5)$  high symmetry points, respectively.

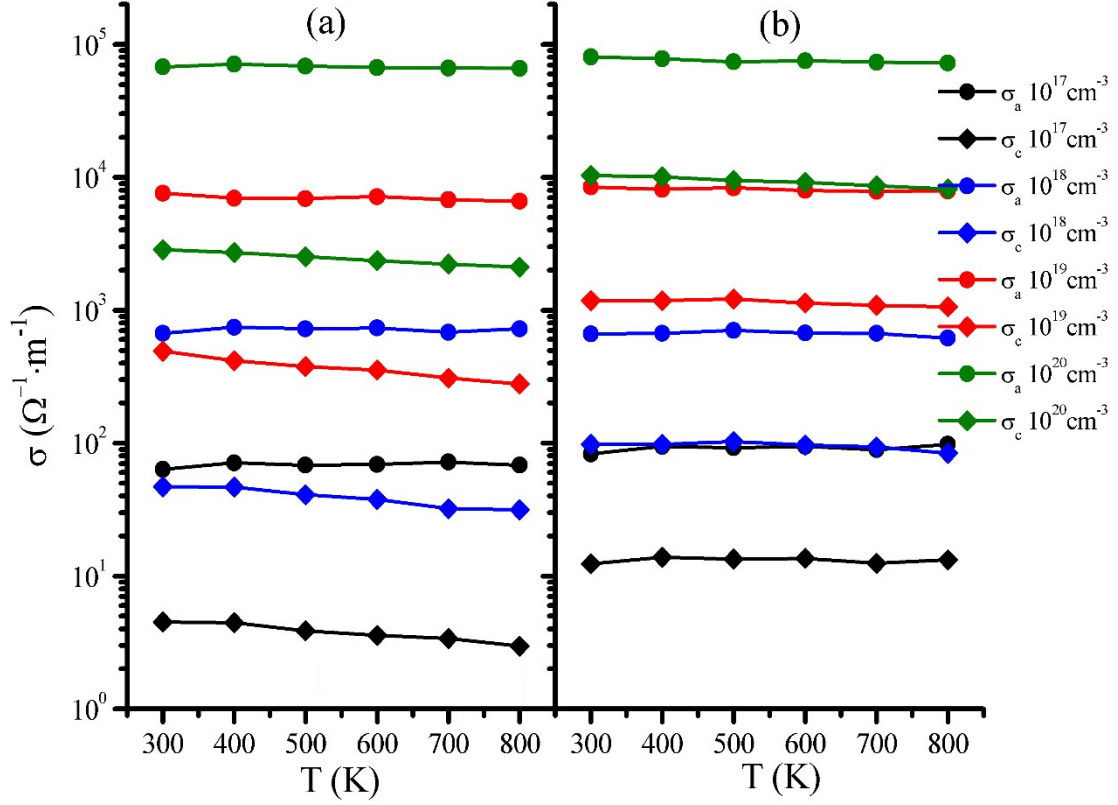

**Fig. S2.** Temperature dependence of the electrical conductivities along the  $a$  ( $\sigma_a$ ) and  $c$  ( $\sigma_c$ ) directions in  $\text{SnS}_2$  (a) and  $\text{SnSe}_2$  (b) for four different carrier concentrations.

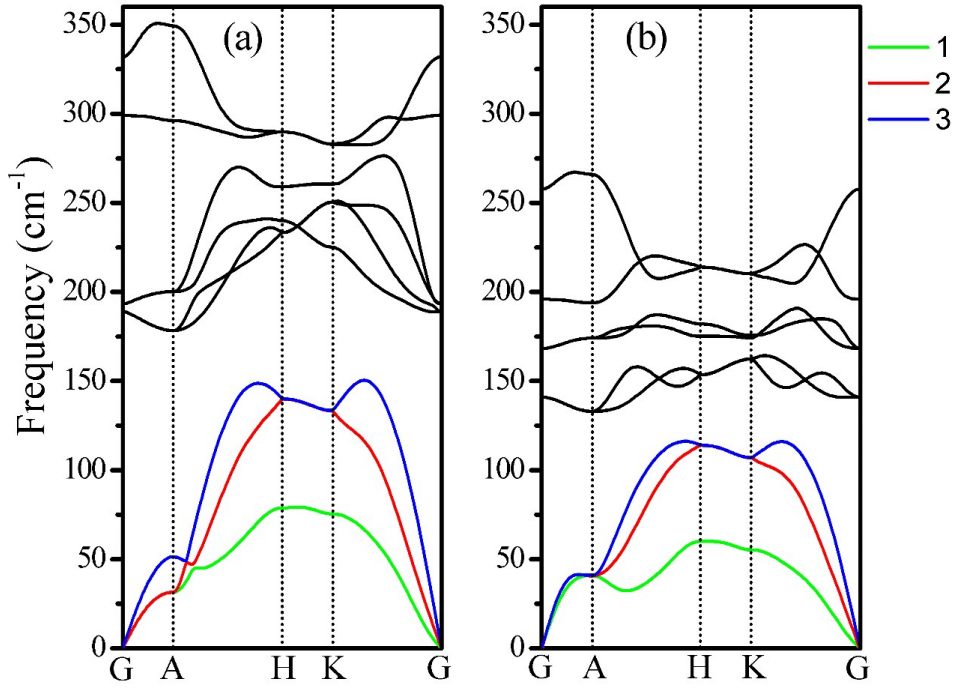

**Fig. S3.** Phonon dispersion of  $\text{SnS}_2$  (a) and  $\text{SnSe}_2$  (b). Three acoustic phonon branches are indicated with different colors.

**Table S1** Debye temperatures ( $\Theta$ ) and phonon velocities ( $v$ ) along the  $a$  and  $c$  axes for SnS<sub>2</sub> and SnSe<sub>2</sub>.

| SnS <sub>2</sub> |              |           | SnSe <sub>2</sub> |              |           |
|------------------|--------------|-----------|-------------------|--------------|-----------|
| GK/a             | $\Theta$ (K) | $v$ (m/s) | GK/a              | $\Theta$ (K) | $v$ (m/s) |
| 1                | 108          | 1538      | 1                 | 80           | 1327      |
| 2                | 191          | 2902      | 2                 | 153          | 2878      |
| 3                | 216          | 5289      | 3                 | 167          | 4452      |
| Average          | 172          | 3243      | Average           | 133          | 2886      |
| GA/c             | $\Theta$ (K) | $v$ (m/s) | GA/c              | $\Theta$ (K) | $v$ (m/s) |
| 1                | 45           | 1904      | 1                 | 59           | 2120      |
| 2                | 45           | 1903      | 2                 | 60           | 2270      |
| 3                | 74           | 2899      | 3                 | 60           | 2270      |
| Average          | 55           | 2235      | Average           | 60           | 2220      |

Values are calculated from the phonon dispersions (Figure S3). The Debye temperature is calculated using  $\Theta = \omega_D/k_B$  ( $\omega_D$  is the largest acoustic frequency in each direction); the phonon velocity is the slope of the acoustic phonon dispersion around the  $G$  point.
